1 **Chromosome segregation drives division site selection**

2 **in *Streptococcus pneumoniae***

3  
4 Renske van Raaphorst<sup>1,†</sup>, Morten Kjos<sup>1,2,†</sup> and Jan-Willem Veening<sup>1,3\*</sup>

5  
6 <sup>1</sup> Molecular Genetics Group, Groningen Biomolecular Sciences and Biotechnology Institute,  
7 Centre for Synthetic Biology, University of Groningen, Nijenborgh 7, 9747 AG, Groningen,  
8 The Netherlands.

9 <sup>2</sup> Department of Chemistry, Biotechnology and Food Science, Norwegian University of Life  
10 Sciences, N-1432 Ås, Norway.

11 <sup>3</sup> Department of Fundamental Microbiology, Faculty of Biology and Medicine, University of  
12 Lausanne, Biophore Building, CH-1015 Lausanne, Switzerland

13 † These authors contributed equally to this work

14 \* Correspondence to: Jan-Willem Veening;

15 Email: Jan-Willem.Veening@unil.ch

16 Twitter, @JWVeening

17 Tel: +41216925625

18 **Abstract**

19

20 **Accurate spatial and temporal positioning of the tubulin-like protein FtsZ is key for**  
21 **proper bacterial cell division. *Streptococcus pneumoniae* (pneumococcus) is an oval-**  
22 **shaped, symmetrically dividing human pathogen lacking the canonical systems for**  
23 **division site control (nucleoid occlusion and the Min-system). Recently, the early**  
24 **division protein MapZ was identified and implicated in pneumococcal division site**  
25 **selection. We show that MapZ is important for proper division plane selection; thus the**  
26 **question remains what drives pneumococcal division site selection. By mapping the cell**  
27 **cycle in detail, we show that directly after replication both chromosomal origin regions**  
28 **localize to the future cell division sites, prior to FtsZ. Perturbing the longitudinal**  
29 **chromosomal organization by mutating the condensin SMC, by CRISPR/Cas9-mediated**  
30 **chromosome cutting or by poisoning DNA decatenation resulted in mistiming of MapZ**  
31 **and FtsZ positioning and subsequent cell elongation. Together, we demonstrate an**  
32 **intimate relationship between DNA replication, chromosome segregation and division**  
33 **site selection in the pneumococcus, providing a simple way to ensure equally sized**  
34 **daughter cells without the necessity for additional protein factors.**

35

## 36 **Introduction**

37 In eukaryotic cells, DNA replication, chromosome segregation and cell division are tightly  
38 coordinated and separated in time (1–3). In most bacteria this is less obvious as these  
39 processes occur simultaneously. However, in the last decade, it has become evident that the  
40 bacterial cell cycle is a highly regulated process, in which both cell cycle proteins as well as  
41 the chromosome have defined spatial and temporal localization patterns (4, 5). The tubulin-  
42 like protein FtsZ (forming the Z-ring) is key for initiating divisome assembly in virtually all  
43 bacteria (6). Accurate cell division is mostly exerted through regulation of FtsZ positioning in  
44 the cell. However, the mechanisms that control FtsZ positioning can be highly diverse  
45 between bacterial species. In well-studied rod-shaped model organisms, such as *Bacillus*  
46 *subtilis* and *Escherichia coli*, precise formation of the Z-ring at midcell is regulated by the so-  
47 called Min-system and nucleoid occlusion (7, 8). These are both negative regulators of FtsZ  
48 polymerization, which prevent premature Z-ring formation and cell division near cell poles  
49 and across unsegregated chromosomes, respectively. These two regulatory mechanisms have  
50 been found in many bacteria. However, in some species other dedicated proteins are used for  
51 this purpose, including MipZ in *Caulobacter crescentus* (9), SsgB in *Streptomyces*  
52 *coelicolor*(10) and PomZ in *Myxococcus xanthus* (11). It is important to note, however, that  
53 none of these FtsZ regulation mechanisms are essential for bacterial growth, and other  
54 mechanisms of cell cycle control must therefore also exist (12–14). In this context, it has been  
55 suggested that there are important links between different cell cycle processes, such as DNA  
56 replication and Z-ring assembly (13–16).

57 As for the opportunistic pathogen *S. pneumoniae*, the orchestration of replication and  
58 chromosome dynamics remains largely unknown. Ovococcal *S. pneumoniae* lack a nucleoid  
59 occlusion system and has no Min-system (17, 18). Recently, the putative division site selector  
60 MapZ (or LocZ) was identified in *S. pneumoniae* (19, 20). This protein localizes early at new

61 cell division sites and positions FtsZ by a direct protein-protein interaction (19). MapZ is  
62 binding peptidoglycan (PG) via an extracellular domain, and is also a target of the master  
63 regulator of pneumococcal cell shape, the Ser/Thr kinase StkP (19–21). Together, this  
64 suggests that for division site selection in *S. pneumoniae*, FtsZ is controlled via the MapZ  
65 beacon at midcell (13, 22, 23). Furthermore, the mechanisms of chromosome segregation in  
66 pneumococci also seem to be different than in rod-shaped model bacteria; *S. pneumoniae*  
67 harbors a single circular chromosome with a partial partitioning system that only contains the  
68 DNA-binding protein ParB with *parS* binding sites, but lacks the ATPase ParA. Furthermore,  
69 the ubiquitous condensin protein SMC is not essential (24). Although both ParB and SMC are  
70 involved in chromosome segregation in pneumococci, *parB* and *smc* mutants have minor  
71 growth defects and a low percentage of anucleate cells (1-4 %) (24, 25). In contrast, in *B.*  
72 *subtilis* deletion of *smc* is lethal at normal growth conditions (26). To gain more  
73 understanding of the progression of the pneumococcal cell cycle, we therefore investigated  
74 the relationship between DNA replication, chromosome segregation and division site  
75 selection in the pneumococcus. We show that MapZ is not involved in division site selection  
76 as suggested before, but is crucial for correctly placing the Z-ring perpendicularly to the  
77 length axis of the cell. By establishing new tools to visualize the replisome and different  
78 genetic loci, we show that there is an intimate relationship between DNA replication,  
79 chromosome segregation and division. Importantly, we demonstrate that correct chromosomal  
80 organization acts as a roadmap for accurate division site selection in pneumococcus and  
81 possibly other bacteria.

82

## 83 **Results**

### 84 **MapZ sets the pneumococcal division plane**

85 In contrast to what can be expected for a protein involved in division site selection,  $\Delta mapZ$   
86 mutants are not elongated but on average shorter than wild type cells (19, 20) with relatively  
87 minor distortions in cell morphology (20, 27), raising questions on what the actual biological  
88 function of MapZ is (27). To reassess the  $\Delta mapZ$  phenotype, we fused MapZ at its N-  
89 terminus to a monomeric superfolder green fluorescent protein (GFP). Using the cell-  
90 segmentation software Oufiti (28), to detect cell outlines and fluorescent signals, in  
91 combination with the newly developed R-package SpotprocessR to analyze the microscopy  
92 data (see Methods), GFP-MapZ localization was determined in exponentially growing cells  
93 (balanced growth). Note that balanced growth, by re-diluting exponentially growing cells  
94 several times, pneumococcal cell length becomes an accurate proxy for the cell cycle state  
95 (18, 21). Cells were ordered by length, and this order was plotted as a density plot against the  
96 position of GFP-MapZ on the long axis of the cells (Fig. 1A). In line with previous reports  
97 (19, 20), GFP-MapZ localized to the division site (Fig. 1A). As new cell wall is synthesized at  
98 midcell (17), MapZ seems to move along with the current division site, probably via  
99 attachment to PG, and ends up at the interface between the new and old cell halves. This  
100 position will eventually become the future division site where the Z-ring assembles. Deleting  
101 *mapZ* in the encapsulated D39 genetic background led to irregularly shaped and shorter,  
102 sometimes branched or clustered cells (Fig. 1B). Similar observations were made in serotype  
103 4 strain TIGR4 and in the unencapsulated R6 laboratory strain (fig. S1A and B). To examine  
104 FtsZ localization, we constructed a C-terminal monomeric red fluorescent protein (mCherry)  
105 fusion to FtsZ expressed from its own locus as the only copy (29). While the FtsZ-mCherry  
106 strain showed a normal cell size distribution in a wild type background, when combined with  
107 the  $\Delta mapZ$  mutant, a clear synthetic phenotype arose and cells were misformed (fig. S2A and

108 B), suggesting that the previously described *mapZ* phenotype in the presence of FtsZ-fusions  
109 should be interpreted with caution (27). Therefore, we replaced FtsZ-mCherry by a functional  
110 FtsZ-CFP or FtsZ-mKate2 (FtsZ-RFP) fusion (fig. S2C and D), and reassessed FtsZ  
111 localization in  $\Delta mapZ$  cells. As reported before (19, 20), localization of FtsZ to future  
112 division sites occurs when MapZ is already localized at this position (Fig. 1A and C). Note,  
113 however, that in stark contrast to MapZ, which gradually moves as new cell wall is  
114 synthesized, FtsZ is highly dynamic and remodels quickly from the previous to the future  
115 division site. Thus, there is only a brief moment in the cell cycle where MapZ and FtsZ  
116 colocalize (cf. Fig. 1A with Fig.1C). Importantly, FtsZ localization over the length axis of the  
117 cell was not affected in  $\Delta mapZ$  cells, suggesting that MapZ is not essential for accurate timing  
118 of Z-ring assembly. To gain more insights into the role of MapZ during septum formation, we  
119 stained cells with fluorescently-labeled vancomycin (Van-FL) to image sites of cell wall  
120 synthesis (30). By measuring the angle of the areas in the cell enriched with Van-FL relative  
121 to the long axis, we observed that the septum was formed perpendicular to the cell axis in the  
122 wild type (median deviation from 90 degrees = 3.08, se = 1.47 degrees), while in  $\Delta mapZ$  cells  
123 this angle was skewed (Fig. 1D, median deviation from 90 degrees = 7.65, se = 1.27 degrees,  
124 significant difference  $p = 0.014$ , Kolmogorov-Smirnov test). Measuring the angle of FtsZ-  
125 CFP in the same manner confirmed that the angle of the Z-ring was skewed in  $\Delta mapZ$  cells  
126 (fig. S2E). These results are in line with previous observations (19, 20) and could explain the  
127 variability in cell shapes observed in  $\Delta mapZ$  mutants. The observed cell shape alterations are  
128 reminiscent of *E. coli* mutants lacking certain low molecular weight penicillin binding  
129 proteins (LMW-PBPs) such as PBP5 that have defected division plane selection and  
130 mislocalized Z-rings (31). LMW-PBPs modify PG by trimming amino acid linkages from the  
131 glycan side chains (32). Since MapZ has a large extracellular PG binding domain and is  
132 controlled by the Ser/Thr kinase StkP (19, 33), which is proposed to be a key player in tuning

133 peripheral and septal peptidoglycan synthesis (21, 34), it is tempting to speculate that MapZ  
134 has a function in cell wall remodeling and subsequently maintaining the perpendicular Z-ring  
135 plane.

136

### 137 **The replisome of *S. pneumoniae* is dynamic around midcell**

138 Since the  $\Delta mapZ$  mutant has moderate effects on division site selection under our  
139 experimental conditions, another system must be in place. Since *S. pneumoniae* lacks the  
140 canonical systems, we hypothesized that ovococci might coordinate division via chromosome  
141 replication and segregation (15). To test this, we first aimed at imaging the DNA replication  
142 machine (replisome) and constructed inducible, ectopic fusions of the single-strand binding  
143 protein (SSB), the  $\beta$  sliding clamp (DnaN) and the clamp loader (DnaX) with GFP or RFP  
144 (mKate2). Fluorescence microscopy showed enriched signals as bright diffraction limited  
145 spots for all fusions, mainly localized in the middle of the cells, similar to what has been  
146 observed for *B. subtilis* and *E. coli* (35, 36) (Fig. 2A). Notably, the background signal of SSB-  
147 RFP was higher than the background of the other fusions, as also reported for *E. coli* (36).  
148 Chromosomal replacements of the fusion constructs with the original gene could only be  
149 obtained for *dnaX*, but not for *ssb* and *dnaN*, suggesting that the fusion tags of these two latter  
150 genes are not fully functional. To validate that the localizations of the fusions represent  
151 biologically active replisomes, we examined their colocalization patterns. As expected, the  
152 ectopically expressed fluorescent fusions of DnaX, DnaN and SSB to RFP colocalize with the  
153 functional DnaX-GFP fusion in live cells (91 % colocalization or more, fig. S3A).

154 In order to study the localization and dynamics of DnaX-GFP relative to the cell poles  
155 and the Z-ring, a DnaX-GFP/FtsZ-mKate2 double-labeled strain was made and exponentially  
156 growing cells were analyzed by fluorescence microscopy. These plots show that DnaX-GFP is  
157 positioned close to midcell with a similar pattern as FtsZ-mKate2, although the DnaX-GFP

158 localization is less precise than FtsZ-RFP (Fig. 2B). To validate these results, tracking single  
159 cells during growth using time-lapse fluorescence microscopy (Fig. 2D and D, fig. S3B,  
160 Movie S1) showed that although the replisome(s) is dynamic, it stays in near proximity to the  
161 Z-ring. Surprisingly, the replisomes move to the future division sites with the same timing as  
162 FtsZ, and the Z-ring does not linger for cell division to finish (Fig. 2D).

163 To gain more insight into the nature of the movement of the replisome, we imaged  
164 DnaX-GFP in short-time interval movies (1 sec, Movie S2) using total internal reflection  
165 fluorescence (TIRF) microscopy. We tracked DnaX-GFP using the single molecule tracking  
166 software U-track (37) and analyzed mobility using SpotprocessR (fig. S3C). As expected,  
167 replisome mobility was significantly lower than that of free diffusing GFP (38). However,  
168 compared to ParB-GFP, which binds to the origin of replication (*oriC*) (24), DnaX-GFP  
169 showed a nearly two-fold higher mobility ( $MSD = 2.66 * 10^{-2} \mu m^2$ ,  $D_{app} = 2.44 * 10^{-3} \mu m^2/s^{-1}$   
170 compared to  $MSD = 8.8 * 10^{-3} \mu m^2$ ,  $D_{app} = 3.19 * 10^{-4} \mu m^2/s^{-1}$ ; fig. S3D and D), indicating that  
171 DnaX movement is not strictly confined by the chromosome.

172

### 173 **The pneumococcal chromosome segregates in a longitudinal fashion**

174 The on average midcell localization of the replication machineries in *S. pneumoniae* suggests  
175 that DNA replication at midcell might determine an ordered chromosomal organization. To  
176 examine this, methods for tagging chromosome positions in this bacterium were established  
177 (figs. S4 and S5). We first constructed a novel chromosome marker system based on  
178 fluorescent protein fusions to ParB of plasmid pLP712 (39) from *Lactococcus lactis* (hereafter  
179 named ParB<sub>p</sub>), which was found to require insertion of only a 18 bp *parS* binding site  
180 (hereafter named *parS*<sub>p</sub>) in the pneumococcal genome for visualizing genetic loci by  
181 microscopy (figs. S4A-C). The *parS*<sub>p</sub> sequence is simpler compared to existing ParB/*parS*  
182 systems and does not require additional host factors (40, 41). Importantly, our system does not



183 perturb DNA replication and is completely orthogonal to *S. pneumoniae* chromosomal ParB  
184 (figs. S4B and S5A-D). Secondly, we adapted the TetR/*tetO* fluorescence repressor-operator  
185 system (FROS) (42) for *S. pneumoniae* and validated that it does not interfere with DNA  
186 replication (figs. S4D and S5A-C). To verify the localization patterns and compatibility of  
187 both systems, we constructed a strain containing both *parS<sub>p</sub>* and *tetO* near *oriC* and showed  
188 that *parB<sub>p</sub>-gfp* and *tetR-rfp* foci colocalize (figs. S5E and F).

189 In total, five chromosomal locations were marked using ParB<sub>p</sub>/*parS<sub>p</sub>* and/or TetR/*tetO*;  
190 the origin-region (359° degrees), right arm (101°), *ter*-region (178° and 182°) and two  
191 positions on the left arm (259° and 295°) (Fig. 3A). Using double-labeled strains under  
192 balanced growth, the localizations of loci were compared revealing that the pneumococcal  
193 genome is organized in a longitudinal fashion (Fig. 3B, fig. S6). The left and right arms move  
194 at the same time to the new daughter cells (Fig. 3B). The terminus region seemed less  
195 confined in space during the cell cycle (Fig. 3B). Strikingly, the origins never localized near  
196 the cell poles as is common in other bacteria (5, 42–44), and arrived to future division sites at  
197 a very early stage, before DnaX and FtsZ, with a similar timing as MapZ (Fig 3B, left panel,  
198 D and E). The early segregation of *oriC* was also observed when single cells were tracked  
199 over time (Fig. 3F, fig. S7 and Movie S3).

200

### 201 **SMC is required for correct segregation of *oriC* and cell shape**

202 The observation that *oriC* arrives at future cell division sites prior to FtsZ opens the question  
203 whether MapZ has a role in directing the chromosome. However, the origin still localized to  
204 the future division site in  $\Delta$ *mapZ* (Fig. 4A). The localizations of MapZ and *oriC* were further  
205 analyzed in a wild type background by sorting the cells into four subgroups according to cell  
206 size and plotting the localizations as histograms over the cell lengths (Fig. 3C, right panel).  
207 This shows that MapZ is localized slightly closer to the old mid-cell in smaller, newborn cells

208 (Fig. 3C, right panel, stars indicate a significant difference in the first three groups of cells,  
209 Kolmogorov-Smirnov test,  $p < 0.05$ ), and that *oriC* localizes to the new mid-cell before  
210 MapZ. Given the early movement of the origin to the future cell division sites, we wondered  
211 whether instead the chromosome or nucleoid associated proteins could play a role in guiding  
212 Z-ring positioning.

213 In many prokaryotes, condensin-like proteins called Structural Maintenance of  
214 Chromosomes (SMC) play a role in the organization and compaction of the chromosome (45).  
215 In *S. pneumoniae*, deletion of *smc* leads to approximately 2% anucleate cells and problems in  
216 chromosome segregation (24, 25). In order to specifically investigate how the absence of  
217 SMC affected chromosome organization, the origin, terminus and left/right arm chromosome  
218 positions were determined in  $\Delta smc$  cells. In line with what has been found using temperature-  
219 sensitive or degradable alleles in *B. subtilis* (46, 47), the origin region arrived to the new  
220 midcell at a considerable delay when SMC was absent (Fig. 4B). Quantitative analysis of the  
221 origin localization showed a significant different localization of *oriC* in  $\Delta smc$  vs wild type  
222 ( $p < 1.5 \cdot 10^{-3}$ , Kolmogorov-Smirnov test, Fig. 4B). Eventually, however, the origins still  
223 segregated to their correct localization in subsequent larger cells. Also note that, segregation  
224 of the left arm, right arm and terminus did not differ significantly from wild type (fig. S8).  
225 Thus, *S. pneumoniae* SMC is specifically important for the early segregation of *oriC*.

226 In the current data, we also found that  $\Delta smc$  cells are longer, more irregularly shaped  
227 and form long chains (Fig. 4B). The same observation was also made upon deletion of *smc* in  
228 strains TIGR4 and R6 (fig. S1A and B). This suggests that *smc* mutants are somehow  
229 defective, not only in chromosome segregation, but also in cell division. We therefore  
230 compared the localization of MapZ and FtsZ in wild type and  $\Delta smc$  cells and found that the  
231 timing and accuracy of MapZ and FtsZ localization was altered in  $\Delta smc$  (Fig. 4D). MapZ  
232 showed an obvious mislocalization; part of the MapZ-rings arrived at the new septa at a later

233 stage, while a large fraction stayed at midcell in larger cells (11% of the MapZ-localizations  
234 in the largest quartile of the cell population stayed at midcell in  $\Delta smc$  cells vs. 4% in wild type  
235 cells, Fig. 4d). For FtsZ, the effect is less pronounced, but a difference in localization  
236 accuracy is observed at the time when new Z-rings were formed (Fig. 4d). Note that the angle  
237 of the division ring is not affected in  $\Delta smc$  cells (fig. S1C). Together these results suggest that  
238 SMC and/or origin localization is important for timely and precise positioning of the cell  
239 division machinery in *S. pneumoniae*.

240         Knowing that both origins and MapZ localize very early in the pneumococcal cell  
241 cycle to the future division sites and that perturbation of both of these individually cause  
242 division problems, we deleted both *smc* and *mapZ* in order to understand more about the link  
243 between them. The double mutant strain was readily obtained, although the strain had severe  
244 defects in growth and cell shape (fig. S1C and D). Notably, the phenotype of the double  
245 mutant looked like a combination of the single mutants; like  $\Delta mapZ$ , the cells were on  
246 average smaller with large cell shape variation due to non-perpendicular division ring  
247 formation (fig. S1D), and like  $\Delta smc$ , they displayed a chaining phenotype probably reflecting  
248 problems with timing of division ring formation leading to consecutive problems in timing of  
249 division and cell wall splitting (fig. S1D). These observations suggest that MapZ and SMC  
250 have independent roles in pneumococcal cell division, where SMC is important for timely  
251 localization of the division site, while MapZ is involved in correct, perpendicular placement  
252 of the division ring.

253

#### 254 **Proper localization of *oriC* is crucial for division site selection in *S. pneumoniae***

255 We show above that deletion of *smc* caused a cell division defect in *S. pneumoniae* distinct  
256 from the  $\Delta mapZ$  phenotype. To untangle whether this was a direct effect of SMC or whether  
257 it was caused by the resulting chromosome organization defect, we exposed *S. pneumoniae* to

258 sublethal concentrations of ciprofloxacin in order to disturb chromosome organization while  
259 keeping *smc* intact. Ciprofloxacin is a broad-spectrum antibiotic which blocks the activities of  
260 type II topoisomerases and thereby affects DNA supercoiling and chromosome decatenation  
261 (48). Strikingly, when exponentially growing cells are transferred to a non-lethal  
262 concentration of ciprofloxacin (0.4  $\mu\text{g}/\text{mL}$ ), cells rapidly increase in cell length and form  
263 longer chains when compared to untreated cells (Fig. 5A and B). Origin splitting was clearly  
264 delayed in ciprofloxacin treated cells, and the timing and accuracy of Z-ring formation was  
265 severely affected (Fig. 5C). Moreover, localization of the replisome was less confined to the  
266 center of the cells, as was observed for  $\Delta\text{smc}$  cells (fig. S9). Note that, at the ciprofloxacin  
267 concentration used in this experiment, replication elongation is reduced, but new rounds of  
268 replication are still initiated (49).

269 Finally, we also perturbed the DNA biology by cutting the chromosome at two  
270 different locations; close to *oriC* (at  $0^\circ$ ) and on the left arm (at  $295^\circ$ ), using an inducible  
271 CRISPR/Cas9 system (see Methods). Whole-genome marker frequency analysis of these  
272 strains after induction of Cas9, showed the expected cleavage of the chromosomal DNA at  
273 these two positions in the respective strains and major alterations in the replication patterns  
274 were observed (Fig. 5D). Cutting of the chromosome also caused severe problems with  
275 mistimed localization of FtsZ (Fig. 5E and F) and increased cell sizes (Fig. 5G). Interestingly,  
276 the effects on DNA replication were more pronounced when Cas9 was targeted to *oriC*  
277 compared to the left arm location, and, subsequently, proper control of Z-ring formation was  
278 completely lost in the former case. Together, these results further confirm that normal  
279 chromosome segregation, and origin segregation in particular, is key for well-timed Z-ring  
280 assembly and cell division progression in *S. pneumoniae*.

281

## 282 Discussion

283 By detailed mapping of DNA replication and chromosome segregation in live *S. pneumoniae*  
284 cells, we found that proper segregation of the chromosomal origin is crucial for division site  
285 selection in this bacterium. We show that the pneumococcal chromosome is organized in a  
286 longitudinal fashion (ori-left/right-ter-ter-left/right-ori; Fig. 3 and fig. S6) with specific  
287 subcellular addresses for each locus. In contrast to *B. subtilis*, *C. crescentus* and fast-growing  
288 *E. coli* (5, 42–44), the origins never localize near the cell poles in *S. pneumoniae*, and the  
289 organization is in this aspect more similar to the situation in slow-growing *E. coli* (50).  
290 Importantly, the newly replicated origins immediately mark the future cell division sites while  
291 the terminus remains at midcell. This organization is somewhat reminiscent of the  
292 chromosomal organization in *B. subtilis* and *E. coli* but is slightly simpler as every replicated  
293 locus eventually segregates to midcell before a new round of replication initiates (Fig. 6).  
294 Segregation of the chromosomal origin was directed by SMC and deletion of *smc* caused a  
295 marked delay in origin segregation, which in turn led to alterations in the timing of  
296 localization of important cell division proteins such as MapZ and FtsZ. Mistimed MapZ and  
297 FtsZ ultimately resulted in chain-forming cells with increased size. Importantly, the observed  
298 cell division defects are not caused by the deletion of *smc per se*; treatment of the cells with  
299 sublethal concentrations of ciprofloxacin or a CRISPR/Cas9-induced segregation block also  
300 caused similar cell division defects (ie. larger cells and chaining). Together, this indicates that  
301 timely segregation and positioning of the chromosomal origin at the quarter position in cells is  
302 important for orchestrating pneumococcal cell division.

303 Recently it was found that MapZ localizes to future division sites before FtsZ and  
304 positions the Z-ring correctly via protein-protein interactions (19, 20). We found that MapZ  
305 gradually moves with a similar timing as the chromosomal origins, but MapZ is not important  
306 for correct *oriC* positioning. On the other hand, perturbation of *oriC* segregation clearly

307 resulted in altered MapZ localization, thus indicating the pivotal role of chromosomal origin  
308 positioning for proper cell division coordination. Notably, MapZ plays an important role in  
309 establishing the correct division plane, since the Z-ring frequently became non-perpendicular  
310 to the cell length axis when *mapZ* was deleted (Fig. 1d). Taken together, this suggests that  
311 while timely *oriC* positioning determines the timing of assembly and position of the cell  
312 division machinery, MapZ is a ruler for the correct angle of the division ring across the cell  
313 (Fig. 6). This explains the highly variable size and shape of  $\Delta mapZ$  cells, as well as the cell  
314 division defect resulting from the mislocalized origins in  $\Delta smc$  and ciprofloxacin-treated cells.  
315 Note, however, that although *oriC* segregation is clearly delayed in both the  $\Delta smc$  strain as  
316 well as in the ciprofloxacin-treated cells, it eventually segregates to the future division sites in  
317 time before Z-ring assembly. This means that there are additional cues, and not solely SMC or  
318 topoisomerases which are involved in segregation and localization of *oriC*, explaining why  
319 the cell division defects resulting from *smc* deletion or ciprofloxacin treatment are not too  
320 severe. How the origin finds or simply remains attached to the future division site is unclear.  
321 We cannot rule out an as-of-yet unknown protein factor playing a role in this, for instance in  
322 keeping the newly replicated origins near the future division site. Perhaps coupled  
323 transcription-translation-transertion of membrane proteins encoded near *oriC* aid in transitory  
324 attachment of the chromosome to the membrane (51, 52). Alternatively, physical, entropy-  
325 driven processes might be at play. In this respect, it is tempting to speculate that the origin  
326 region, which was recently shown to be highly structured and globular in shape (53), is  
327 pushed outside the region of active DNA replication and remains rather stationary in the  
328 crowded cytoplasm (54). The large globular structure of the origin can then act as a landmark  
329 for FtsZ polymerization and Z-ring formation. This hypothesis is in line with previous  
330 cytological observations demonstrating the absence of nucleoid occlusion in *S. pneumoniae*  
331 and efficient Z-ring formation over the nucleoid (25, 55). The here-described division site

332 selection mechanism by chromosomal organization is a simple way to coordinate DNA  
333 replication, chromosome segregation and division without the need for specialized regulators  
334 of FtsZ. Future research should reveal if this mechanism is also in place in other bacteria and  
335 whether the intimate relation between chromosome segregation and cell division can be used  
336 to treat bacterial infections using combination therapy targeting both processes.

337

### 338 **References**

- 339 1. B. Alberts *et al.*, in *Molecular Biology of the Cell*. (Garland Science, Taylor & Francis  
340 Group, New York, ed. 6th, 2014), pp. 963–1020.
- 341 2. J. P. Fededa, D. W. Gerlich, Molecular control of animal cell cytokinesis. *Nat. Cell*  
342 *Biol.* **14**, 440–7 (2012).
- 343 3. A. H. Willet, N. A. McDonald, K. L. Gould, Regulation of contractile ring formation  
344 and septation in *Schizosaccharomyces pombe*. *Curr. Opin. Microbiol.* **28**, 46–52  
345 (2015).
- 346 4. J.-Y. Bouet, M. Stouf, E. Lebailly, F. Cornet, Mechanisms for chromosome  
347 segregation. *Curr. Opin. Microbiol.* **22**, 60–5 (2014).
- 348 5. X. Wang, D. Z. Rudner, Spatial organization of bacterial chromosomes. *Curr. Opin.*  
349 *Microbiol.* **22**, 66–72 (2014).
- 350 6. W. Margolin, FtsZ and the division of prokaryotic cells and organelles. *Nat. Rev. Mol.*  
351 *Cell Biol.* **6**, 862–871 (2005).
- 352 7. V. W. Rowlett, W. Margolin, The Min system and other nucleoid-independent  
353 regulators of Z ring positioning. *Front. Microbiol.* **6**, 478 (2015).
- 354 8. D. W. Adams, L. J. Wu, J. Errington, Cell cycle regulation by the bacterial nucleoid.  
355 *Curr. Opin. Microbiol.* **22**, 94–101 (2014).
- 356 9. M. Thanbichler, L. Shapiro, MipZ, a spatial regulator coordinating chromosome

- 357 segregation with cell division in *Caulobacter*. *Cell*. **126**, 147–162 (2006).
- 358 10. J. Willemse, J. W. Borst, E. De Waal, T. Bisseling, G. P. Van Wezel, Positive control  
359 of cell division: FtsZ is recruited by SsgB during sporulation of *Streptomyces*. *Genes*  
360 *Dev.* **25**, 89–99 (2011).
- 361 11. A. Treuner-Lange *et al.*, PomZ, a ParA-like protein, regulates Z-ring formation and cell  
362 division in *Myxococcus xanthus*. *Mol. Microbiol.* **87**, 235–253 (2013).
- 363 12. J. Männik, M. W. Bailey, Spatial coordination between chromosomes and cell division  
364 proteins in *Escherichia coli*. *Front. Microbiol.* **6**, 306 (2015).
- 365 13. L. G. Monahan, A. T. F. Liew, A. L. Bottomley, E. J. Harry, Division site positioning  
366 in bacteria: one size does not fit all. *Front. Microbiol.* **5**, 19 (2014).
- 367 14. A. Zaritsky, C. L. Woldringh, Chromosome replication, cell growth, division and  
368 shape: a personal perspective. *Front. Microbiol.* **6**, 756 (2015).
- 369 15. I. V. Hajduk, C. D. A. Rodrigues, E. J. Harry, Connecting the dots of the bacterial cell  
370 cycle: Coordinating chromosome replication and segregation with cell division. *Semin.*  
371 *Cell Dev. Biol.* **53**, 2–9 (2016).
- 372 16. M. Wallden *et al.*, The synchronization of replication and division cycles in individual  
373 *E. coli* cells. *Cell*. **166**, 729–739 (2016).
- 374 17. M. G. Pinho, M. Kjos, J.-W. Veening, How to get (a)round: mechanisms controlling  
375 growth and division of coccoid bacteria. *Nat. Rev. Microbiol.* **11**, 601–14 (2013).
- 376 18. D. Fadda *et al.*, *Streptococcus pneumoniae* DivIVA: Localization and interactions in a  
377 MinCD-free context. *J. Bacteriol.* **189**, 1288–1298 (2007).
- 378 19. A. Fleurie *et al.*, MapZ marks the division sites and positions FtsZ rings in  
379 *Streptococcus pneumoniae*. *Nature*. **516**, 259–262 (2014).
- 380 20. N. Holečková *et al.*, LocZ Is a new cell division protein involved in proper septum  
381 placement in *Streptococcus pneumoniae*. *MBio.* **6**, e01700-14 (2014).



- 382 21. K. Beilharz *et al.*, Control of cell division in *Streptococcus pneumoniae* by the  
383 conserved Ser/Thr protein kinase StkP. *Proc. Natl. Acad. Sci.* **109**, E905–E913 (2012).
- 384 22. M. Bramkamp, Following the equator: division site selection in *Streptococcus*  
385 *pneumoniae*. *Trends Microbiol.* **23**, 121–122 (2015).
- 386 23. C. Grangeasse, Rewiring the pneumococcal cell cycle with serine/threonine- and  
387 tyrosine-kinases. *Trends Microbiol.* (2016).
- 388 24. A. Minnen, L. Attaiech, M. Thon, S. Gruber, J.-W. Veening, SMC is recruited to *oriC*  
389 by ParB and promotes chromosome segregation in *Streptococcus pneumoniae*. *Mol.*  
390 *Microbiol.* **81**, 676–688 (2011).
- 391 25. M. Kjos, J. W. Veening, Tracking of chromosome dynamics in live *Streptococcus*  
392 *pneumoniae* reveals that transcription promotes chromosome segregation. *Mol.*  
393 *Microbiol.* **91**, 1088–1105 (2014).
- 394 26. R. A. Britton, D. C. Lin, A. D. Grossman, Characterization of a prokaryotic SMC  
395 protein involved in chromosome partitioning. *Genes Dev.* **12**, 1254–9 (1998).
- 396 27. M. J. Boersma *et al.*, Minimal peptidoglycan (PG) turnover in wild-type and PG  
397 hydrolase and cell division mutants of *Streptococcus pneumoniae* D39 growing  
398 planktonically and in host-relevant biofilms. *J. Bacteriol.* **197**, 3472–3485 (2015).
- 399 28. A. Paintdakhi *et al.*, Oufiti: an integrated software package for high-accuracy, high-  
400 throughput quantitative microscopy analysis. *Mol. Microbiol.* **99**, 767–777 (2016).
- 401 29. K. Beilharz, R. van Raaphorst, M. Kjos, J. W. Veening, Red fluorescent proteins for  
402 gene expression and protein localization studies in *Streptococcus pneumoniae* and  
403 efficient transformation with DNA assembled via the Gibson assembly method. *Appl.*  
404 *Environ. Microbiol.* **81**, 7244–7252 (2015).
- 405 30. R. A. Daniel, J. Errington, Control of cell morphogenesis in bacteria: two distinct ways  
406 to make a rod-shaped cell. *Cell.* **113**, 767–776 (2003).

- 407 31. L.-P. Potluri, M. A. de Pedro, K. D. Young, *Escherichia coli* low-molecular-weight  
408 penicillin-binding proteins help orient septal FtsZ, and their absence leads to  
409 asymmetric cell division and branching. *Mol. Microbiol.* **84**, 203–224 (2012).
- 410 32. D. L. Popham, K. D. Young, Role of penicillin-binding proteins in bacterial cell  
411 morphogenesis. *Curr. Opin. Microbiol.* **6**, 594–599 (2003).
- 412 33. S. Manuse *et al.*, Structure-function analysis of the extracellular domain of the  
413 pneumococcal cell division site positioning protein MapZ. *Nat. Commun.* **7**, 12071  
414 (2016).
- 415 34. A. Fleurie *et al.*, Interplay of the serine/threonine-kinase StkP and the paralogs DivIVA  
416 and GpsB in pneumococcal cell elongation and division. *PLoS Genet.* **10**, e1004275  
417 (2014).
- 418 35. K. P. Lemon, A. D. Grossman, Movement of replicating DNA through a stationary  
419 replisome. *Mol. Cell.* **6**, 1321–1330 (2000).
- 420 36. R. Reyes-Lamothe, C. Possoz, O. Danilova, D. J. Sherratt, Independent positioning and  
421 action of *Escherichia coli* replisomes in live cells. *Cell.* **133**, 90–102 (2008).
- 422 37. K. Jaqaman *et al.*, Robust single-particle tracking in live-cell time-lapse sequences.  
423 *Nat. Methods.* **5**, 695–702 (2008).
- 424 38. M. B. Elowitz, M. G. Surette, P. E. Wolf, J. B. Stock, S. Leibler, Protein mobility in  
425 the cytoplasm of *Escherichia coli*. *J. Bacteriol.* **181**, 197–203 (1999).
- 426 39. U. Wegmann, K. Overweg, S. Jeanson, M. Gasson, C. Shearman, Molecular  
427 characterization and structural instability of the industrially important composite  
428 metabolic plasmid pLP712. *Microbiology.* **158**, 2936–2945 (2012).
- 429 40. Y. Li, K. Sergueev, S. Austin, The segregation of the *Escherichia coli* origin and  
430 terminus of replication. *Mol. Microbiol.* **46**, 985–996 (2002).
- 431 41. B. E. Funnell, L. Gagnier, P1 plasmid partition: binding of P1 ParB protein and

- 432 *Escherichia coli* integration host factor to altered *parS* sites. *Biochimie*. **76**, 924–932  
433 (1994).
- 434 42. X. Wang, P. Montero Llopis, D. Z. Rudner, *Bacillus subtilis* chromosome organization  
435 oscillates between two distinct patterns. *Proc. Natl. Acad. Sci. U. S. A.* **111**, 12877–  
436 12882 (2014).
- 437 43. P. H. Viollier *et al.*, Rapid and sequential movement of individual chromosomal loci to  
438 specific subcellular locations during bacterial DNA replication. *Proc. Natl. Acad. Sci.*  
439 *U. S. A.* **101**, 9257–9262 (2004).
- 440 44. B. Youngren, H. J. Nielsen, S. Jun, S. Austin, The multifork *Escherichia coli*  
441 chromosome is a self-duplicating and self-segregating thermodynamic ring polymer.  
442 *Genes Dev.* **28**, 71–84 (2014).
- 443 45. S. Gruber, Multilayer chromosome organization through DNA bending, bridging and  
444 extrusion. *Curr. Opin. Microbiol.* **22**, 102–110 (2014).
- 445 46. X. Wang *et al.*, The SMC condensin complex is required for origin segregation in  
446 *Bacillus subtilis*. *Curr. Biol.* **24**, 287–292 (2014).
- 447 47. S. Gruber *et al.*, Interlinked sister chromosomes arise in the absence of condensin  
448 during fast replication in *B. subtilis*. *Curr. Biol. CB.* **24**, 293–298 (2014).
- 449 48. E. Fernandez-Moreira, D. Balas, I. Gonzalez, A. G. de la Campa, Fluoroquinolones  
450 inhibit preferentially *Streptococcus pneumoniae* DNA topoisomerase IV than DNA  
451 gyrase native proteins. *Microb. Drug Resist.* **6**, 259–67 (2000).
- 452 49. J. Slager, M. Kjos, L. Attaiech, J. W. Veening, Antibiotic-induced replication stress  
453 triggers bacterial competence by increasing gene dosage near the origin. *Cell.* **157**,  
454 395–406 (2014).
- 455 50. X. Wang, X. Liu, C. Possoz, D. J. Sherratt, The two *Escherichia coli* chromosome arms  
456 locate to separate cell halves. *Genes Dev.* **20**, 1727–31 (2006).

- 457 51. C. L. Woldringh, The role of co-transcriptional translation and protein translocation  
458 (transertion) in bacterial chromosome segregation. *Mol. Microbiol.* **45**, 17–29 (2002).
- 459 52. E. A. Libby, M. Roggiani, M. Goulian, Membrane protein expression triggers  
460 chromosomal locus repositioning in bacteria. *Proc. Natl. Acad. Sci. U. S. A.* **109**, 7445–  
461 50 (2012).
- 462 53. M. Marbouty *et al.*, Condensin- and replication-mediated bacterial chromosome  
463 folding and origin condensation revealed by Hi-C and super-resolution imaging. *Mol.*  
464 *Cell.* **59**, 588–602 (2015).
- 465 54. B. R. Parry *et al.*, The bacterial cytoplasm has glass-like properties and is fluidized by  
466 metabolic activity. *Cell.* **156**, 183–194 (2014).
- 467 55. A. D. Land *et al.*, Requirement of essential Pbp2x and GpsB for septal ring closure in  
468 *Streptococcus pneumoniae* D39. *Mol. Microbiol.* **90**, 939–955 (2013).

469

470 **Acknowledgments:** We thank Jeroen Siebring for initial work on *parB<sub>p</sub>*, Lieke van  
471 Gijtenbeek for providing *m(sf)gfp* and Oliver Gericke and Katrin Beilharz for technical  
472 assistance. We thank GeneCore, EMBL, Heidelberg for sequencing and Jelle Slager and  
473 Rieza Aprianto for help with analysis. Sequencing data is available at [https://seek.sysmo-](https://seek.sysmo-db.org/investigations/93#datafiles)  
474 [db.org/investigations/93#datafiles](https://seek.sysmo-db.org/investigations/93#datafiles). We thank Dirk-Jan Scheffers for stimulating discussions  
475 and Sophie Martin and Stephan Gruber for constructive feedback on our manuscript. Work in  
476 the Veening lab is supported by the EMBO Young Investigator Program, a VIDI fellowship  
477 (864.12.001) and ERC starting grant 337399-PneumoCell. MK is supported by a grant from  
478 The Research Council of Norway (250976/F20).

479 **Figures and legends**

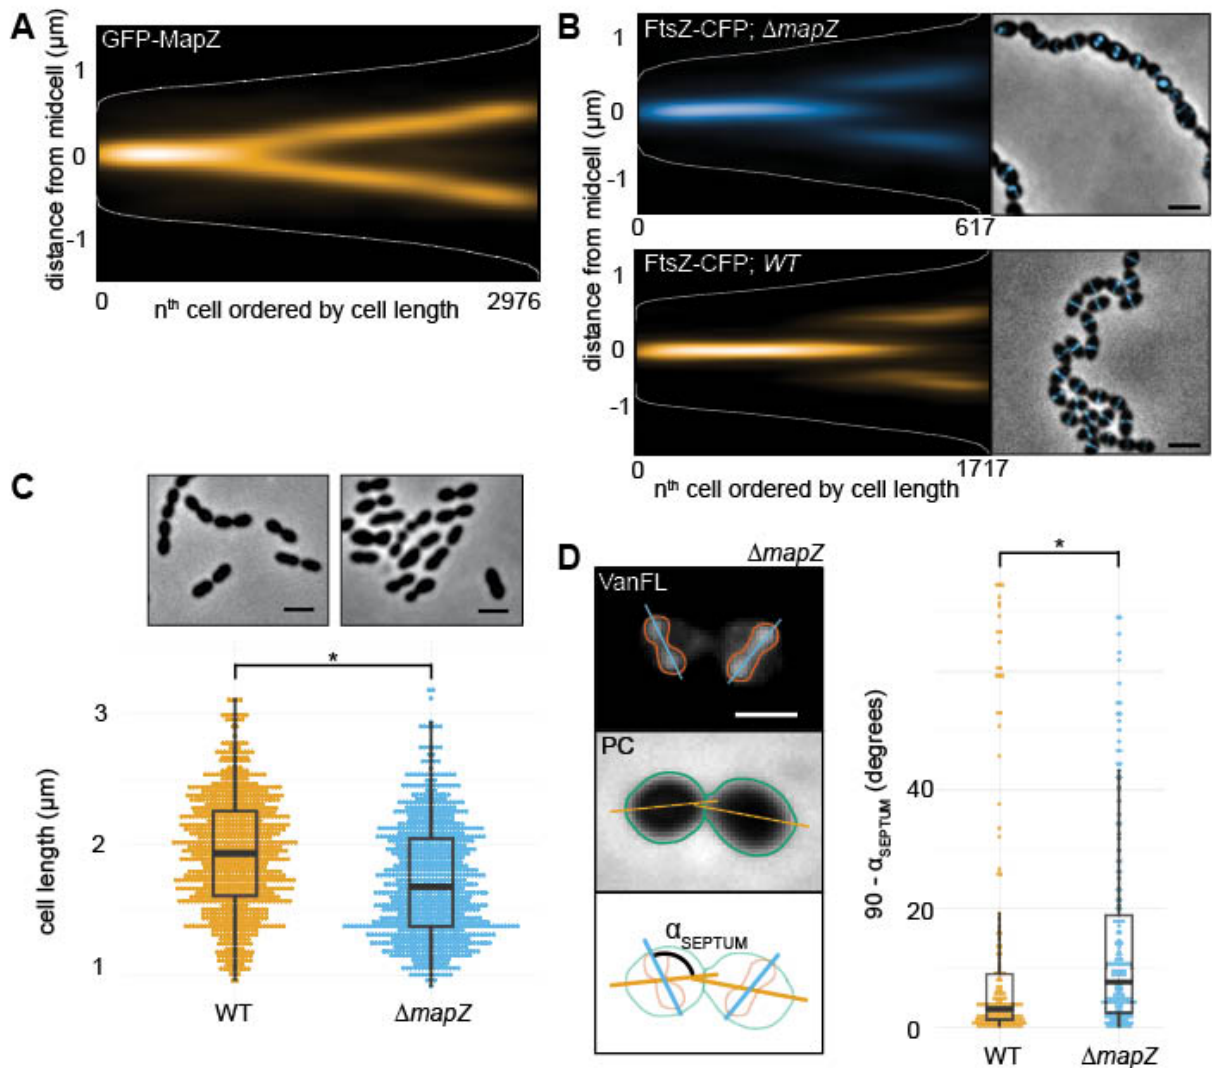

480

481 **Fig. 1. MapZ sets the pneumococcal division plane but is not involved in division site**  
 482 **selection.** (A) Fluorescence microscopy of 2976 cells, 7020 spot localizations were quantified  
 483 and analyzed using Oufitie & SpotprocessR (see Methods). The distance of GFP-MapZ (strain  
 484 RR101) from midcell was plotted in a heatmap where all localizations are ordered by cell  
 485 length, and the color saturation represents protein density. MapZ is present at midcell at an  
 486 early stage during the cell cycle. (B) Cell size distribution of wild type D39 and  $\Delta mapZ$  cells  
 487 (strain RR93), representing measurements of 1692 and 705 cells, respectively. Top: phase  
 488 contrast microscopy images. Scale bar is 2  $\mu\text{m}$ . (C). The localization of FtsZ-CFP in wild type

489 (strain RR23) and  $\Delta mapZ$  (strain RR105) cells as shown by histograms and micrographs from  
490 overlays of phase contrast images with CFP signal. Scale bar is 2  $\mu\text{m}$ . The plots are based on  
491 data from 617 cells/957 localizations for  $\Delta mapZ$  and 1717 cells/2328 localizations for wild  
492 type. **(D)**. The angle of the septum relative to the length axis of the cells is less precise in  
493  $\Delta mapZ$  cells. Left: wild type D39 and  $\Delta mapZ$  cells (strain RR93) were stained with  
494 fluorescently labeled vancomycin (VanFL). Fluorescence image (top), phase contrast image  
495 (middle) and a schematic drawing of the analysis (bottom) are shown. The angle,  $\alpha_{\text{SEPTUM}}$ ,  
496 was measured automatically by measuring the angle between the long axis of the bounding  
497 boxes of the cell outlines and the long axis of the bounding box of the VanFL signal. Scale  
498 bar is 1  $\mu\text{m}$ . Right: the  $\alpha_{\text{SEPTUM}}$  plotted in wild type cells and  $\Delta mapZ$  cells. 177 and 181 cells  
499 were measured for wild type and  $\Delta mapZ$ , respectively.

500

501

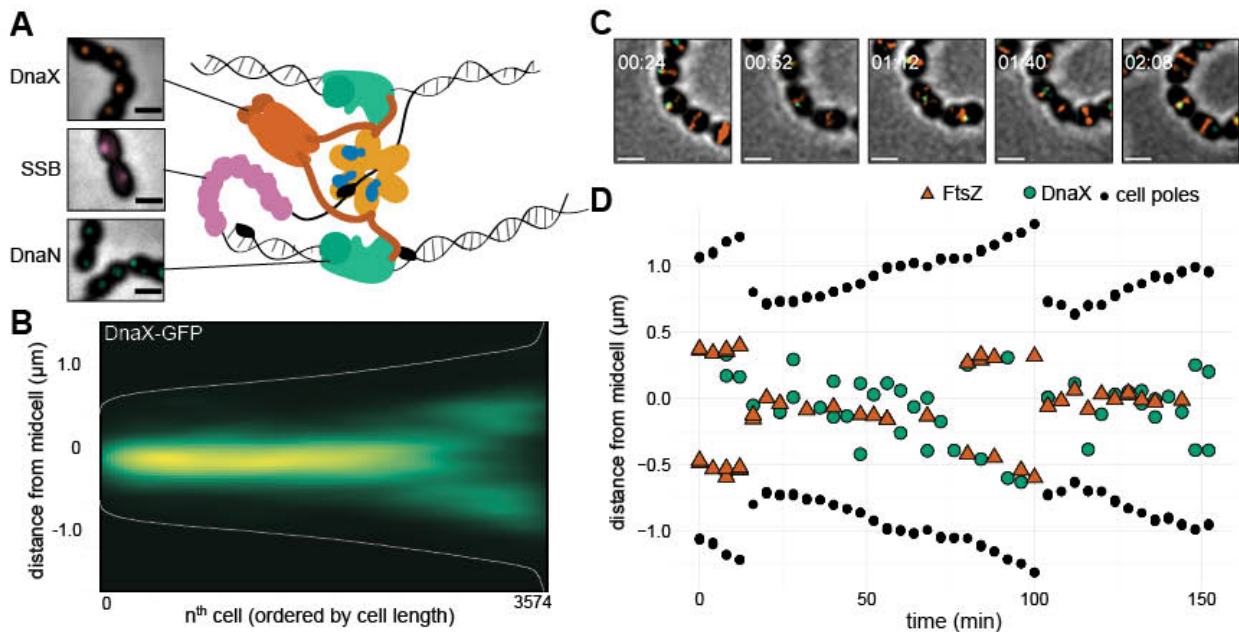

502

503

504

505

506

507

508

509

510

511

512

513

**Fig. 2. Localization of the pneumococcal replisome.** (A) Localization of DnaX-GFP (RR31), GFP-DnaN (DJS02) and SSB-GFP (RR33). A cartoon of the bacterial replication fork shows the role of DnaX (clamp loader), SSB (single-strand binding protein) and DnaN ( $\beta$  sliding clamp). (B) Plotting the localization of DnaX-GFP (RR22) shows that the replisome is localized at midcell. Data from a total of 3574 cells, 3214 unique localizations. (C) Snap shots from a representative time-lapse movie of strain MK396 (*dnaX-GFP*, *ftsZ-mKate2*). Overlays of GFP, RFP and phase contrast are shown. Scale bar is 1  $\mu$ m (D) Transcript of the cell shown in Fig. 2C. The distance of FtsZ (red), DnaX (green) and the cell poles (black) to midcell is plotted against time. The data is also shown in Movie S1. Transcripts of more single cells are shown in fig. S3.

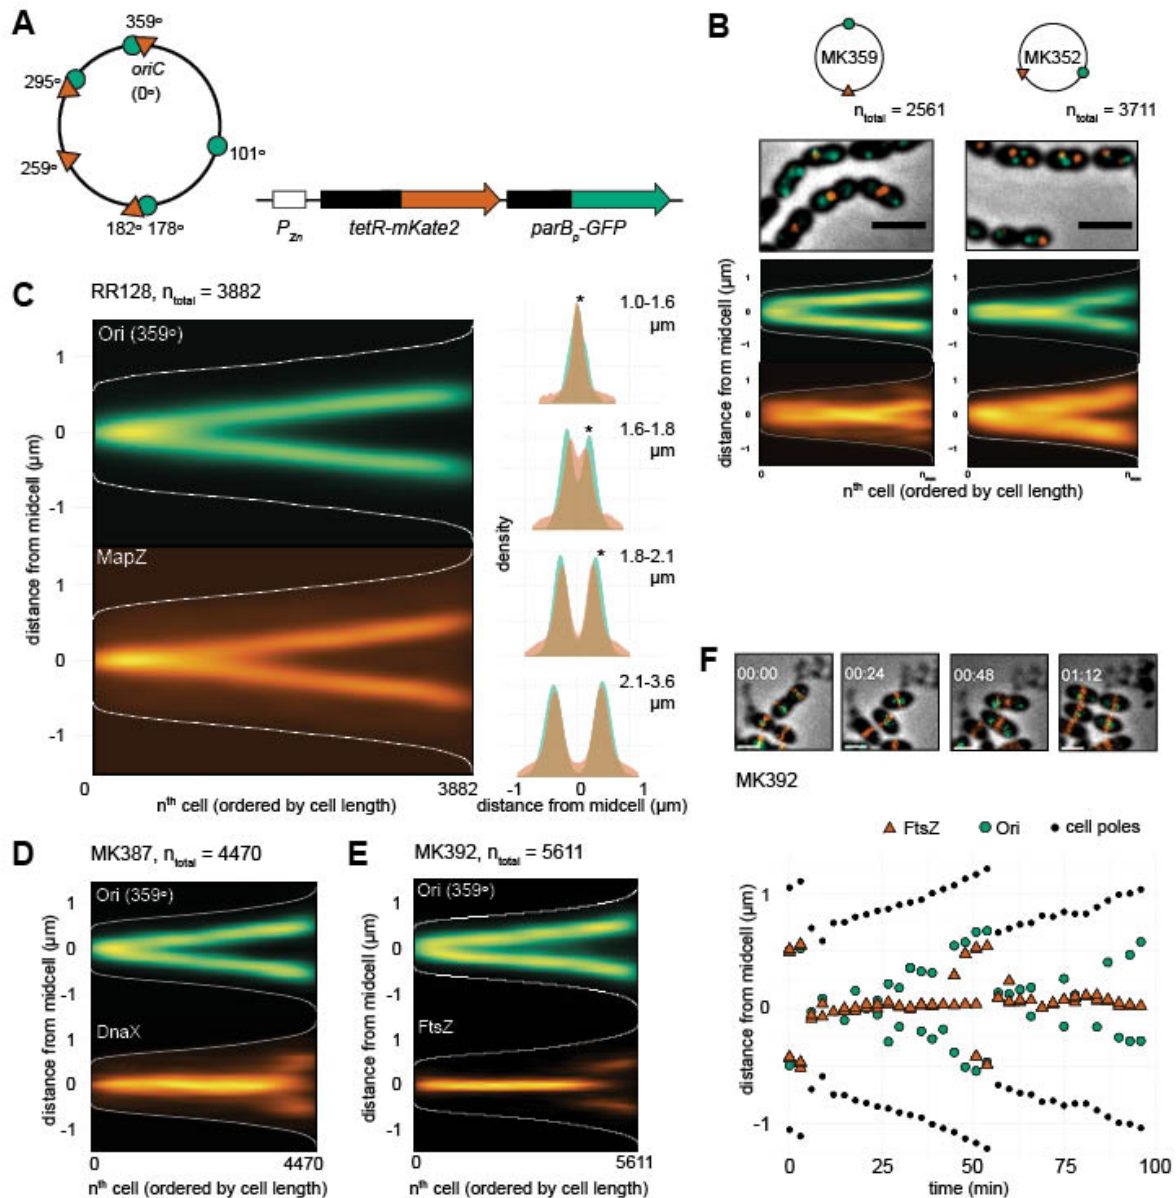

514

515 **Fig. 3. Chromosomal organization in *S. pneumoniae*.** (A) Visualizing specific genetic loci  
 516 in live cells by fluorescence microscopy was done by developing two independent  
 517 chromosomal markers systems; TetR-mKate/*tetO* (*tetO* integration sites indicated by red  
 518 triangles on the chromosome map) and ParB<sub>p</sub>-GFP/*parS<sub>p</sub>* (*parS<sub>p</sub>* integration sites indicated by  
 519 green circles). *tetR-RFP* and *parB<sub>p</sub>-GFP* are ectopically expressed from the non-essential  
 520 *bgaA* locus under control of the Zn<sup>2+</sup>-inducible promoter P<sub>Zn</sub>. (B) Localization of the origin  
 521 and terminus (MK359, left panel) and left and right arm (MK352, right panel) in  
 522 exponentially growing cells. Overlays of GFP signal, RFP signals and phase contrast images



523 are shown. Scale bars are 2  $\mu\text{m}$ . The data represents 2561 cells/3815 GFP-localizations/2793  
524 RFP-localizations from MK359 and 3711 cells/5288 GFP-localizations/4372 RFP-  
525 localizations from MK352. **(C)** Localization of the origin (ParB<sub>p</sub>-GFP/*parS<sub>p</sub>* at 359°) and  
526 RFP-MapZ (RR128) on the length-axis of the cell shown as heatmaps (left) and overlay of  
527 both localization density plots when the cells are grouped in four quartiles by cell length  
528 (right). Stars indicate a significant difference between GFP and RFP localization  
529 (Kolmogorov-Smirnov test,  $p < 0.05$ ). The data represents 3882 cells/1785 GFP-  
530 localizations/8984 RFP localizations. **(D)** Localization of the origin (ParB<sub>p</sub>-GFP/*parS<sub>p</sub>* at  
531 359°) and DnaX-RFP (MK387). The data represents 4470 cells/5877 GFP-localizations/4967  
532 RFP-localizations. **(E)** Localization of the origin (ParB<sub>p</sub>-GFP/*parS<sub>p</sub>* at 359°) and FtsZ-RFP  
533 (MK392). The data represents a total of 5611 cells/6628 GFP-localizations/26674 RFP-  
534 localizations. **(F)** Time-lapse microscopy shows that the origins move to the next cell halves  
535 before FtsZ. Snap shots from a representative time-lapse experiment (top) and plotting of the  
536 distances of FtsZ, the origins and the cell poles relative to midcell in a single cell (bottom) are  
537 shown. More examples of origin and FtsZ localizations in single cells are shown in fig. S7.  
538

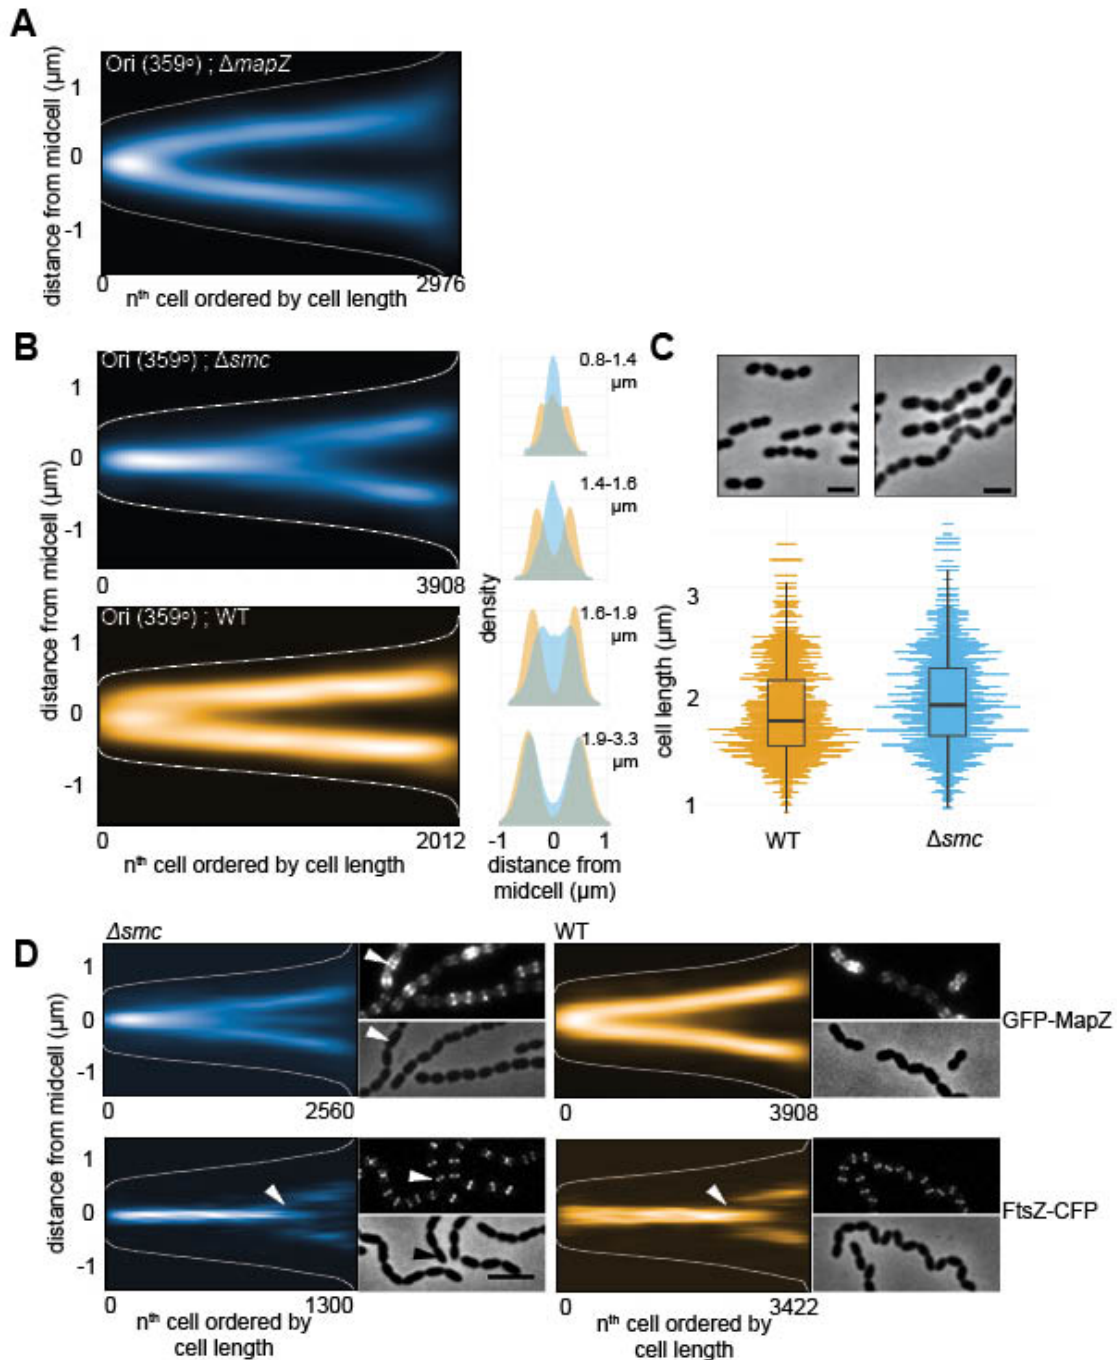

539

540 **Fig. 4. SMC is required for origin segregation and accurate division site selection. (A)**

541 Localization of the chromosomal origin (ParB<sub>p</sub>-GFP/*parS<sub>p</sub>* at 359°) in a  $\Delta mapZ$  background

542 shows that MapZ does not affect origin segregation (RR99). The data represents 2976

543 cells/7020 localizations. (B) The origins (ParB<sub>p</sub>-GFP/*parS<sub>p</sub>* at 359°) are segregated at a later

544 stage in the cell cycle in  $\Delta smc$  compared to wild type. The localizations are shown as

545 heatmaps when cells are sorted according to length (left) and as overlay of both localization

546 density plots when the cells are grouped in four quartiles by cell length (right). The data  
547 represents 2012 cells/3815 localizations for wild type (MK359) and 3908 cells/5192  
548 localizations for the  $\Delta smc$  mutant (MK368). **(C)** Phase contrast images of wild type D39 and  
549  $\Delta smc$  cells (AM39). The scale bar is 2  $\mu\text{m}$  (top). Comparison of cell lengths between the wild  
550 type (1407 cell analyzed) and  $\Delta smc$  (1035 cells analyzed, bottom). **(D)** Localization of GFP-  
551 MapZ and FtsZ-CFP in wild type versus  $\Delta smc$ . Fluorescence and phase contrast micrographs  
552 are shown along with heatmaps. The arrowhead in the micrograph points to a cell with clearly  
553 mislocalized MapZ. The arrowheads in the heatmap point the time when FtsZ remodels and  
554 assembles at the new division site in the wild type and in  $\Delta smc$ . Data represents 2560  
555 cells/5314 localizations ( $\Delta smc$ , GFP-MapZ, RR110), 1300 cells/2257 localizations ( $\Delta smc$ ,  
556 FtsZ-CFP, RR84), 3908 cells/3128 localizations (wild type, GFP-MapZ, RR101) and 3422  
557 cells/29464 localizations (wild type, FtsZ-CFP, RR70).

558

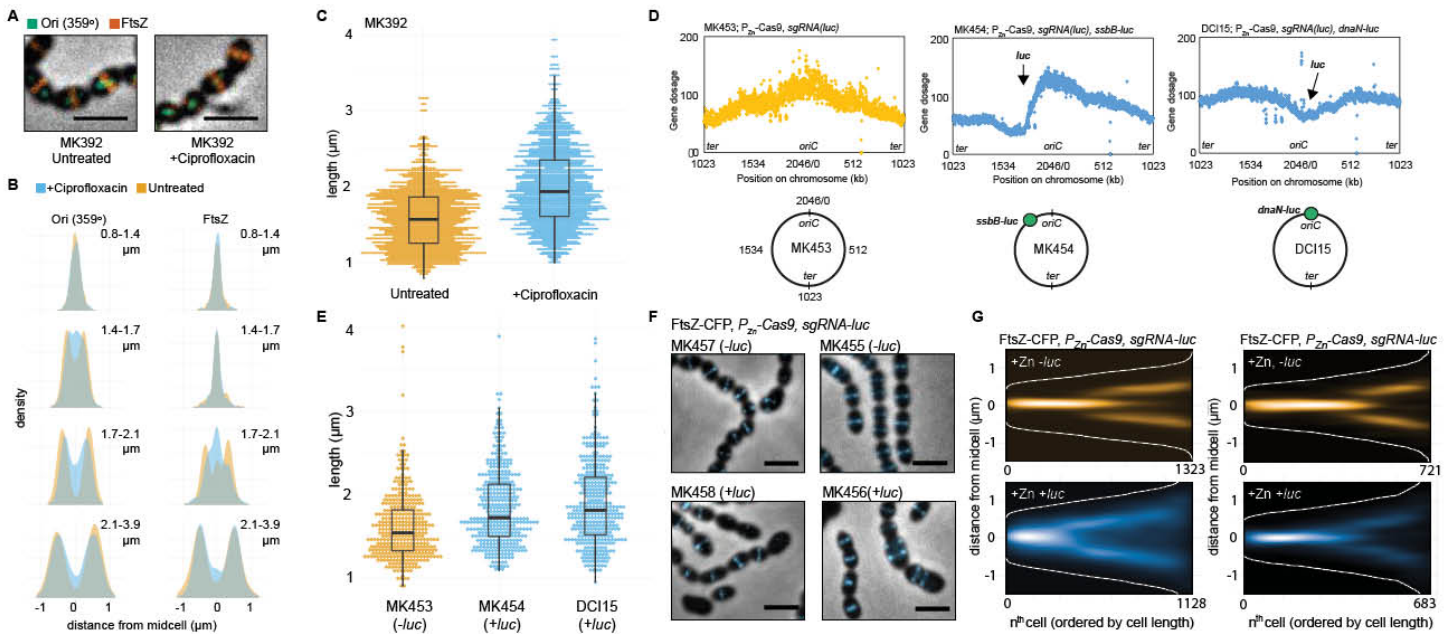

559

560 **Fig. 5. Perturbed chromosome segregation delays cell division.** (A-C) Comparison of *S.*  
 561 *pneumoniae* D39 wild type cells treated or untreated with sublethal concentrations (0.4  $\mu\text{g/ml}$ )  
 562 of ciprofloxacin for 60 min. (A) Images of strain MK392 (ParB<sub>p</sub>-GFP/*parS*<sub>p</sub> at 359°, FtsZ-  
 563 RFP) with overlay of phase contrast, GFP signals representing the origin and RFP signal  
 564 representing FtsZ-RFP. Scale bar is 2  $\mu\text{m}$ . (B) Subcellular localization of the origin (left) and  
 565 FtsZ (right) in MK392 cells treated (blue) or untreated (yellow) with ciprofloxacin.  
 566 Localization density plots when the cells are grouped in four quartiles by cell lengths are  
 567 shown. Data represents 1138 cells/2518 RFP-localizations/2762 GFP-localizations for cells  
 568 treated with ciprofloxacin and 1402 cells/2940 RFP-localizations/2540 GFP-localizations for  
 569 untreated cells. (C) Cell length comparison of ciprofloxacin-treated (total 1138) and non-  
 570 treated (total 1402) cells (MK392). (D-G). Comparisons of cells with or without Cas9-  
 571 nuclease cut chromosome. The expression of Cas9 (together with a constitutively expressed

572 single-guide RNA directed to the *luc*-gene) was induced in cells with or without the *luc* gene  
573 located on the chromosome. The *luc* gene was inserted either in the origin region (0°) or at the  
574 left arm (301°). **(D)** Whole genome marker frequency analysis of strains without *luc*  
575 (MK453), *luc* at 301° (MK454) or *luc* at the origin (DCI15). The number of mapped reads  
576 (gene dosage) is plotted as a function of the position on the circular chromosome. The  
577 chromosomal position of the inserted *luc* gene is indicated in the plot and on the schematic  
578 chromosome maps. **(E)** Cell size comparison of cells with and without cut chromosomes. The  
579 number of cells measured were 643 for the non-cut strain (MK453), 393 for the strain cut at  
580 301° (MK454) and 383 for the strain cut near the origin (DCI15). **(F)** Overlay of FtsZ-CFP  
581 signals with phase contrast images show that cell morphologies are affected in cells with cut  
582 chromosomes. Scale bar is 2 μm. **(G)** Localization of FtsZ-CFP shown as heat maps where  
583 cells are ordered according to cell length. The data represents 1323 cells/3117 localizations  
584 for MK455, 1128 cells/3509 localizations for MK456, 721 cells/1133 localizations for  
585 MK457 and 683 cells/1209 localizations for MK458.

586

587

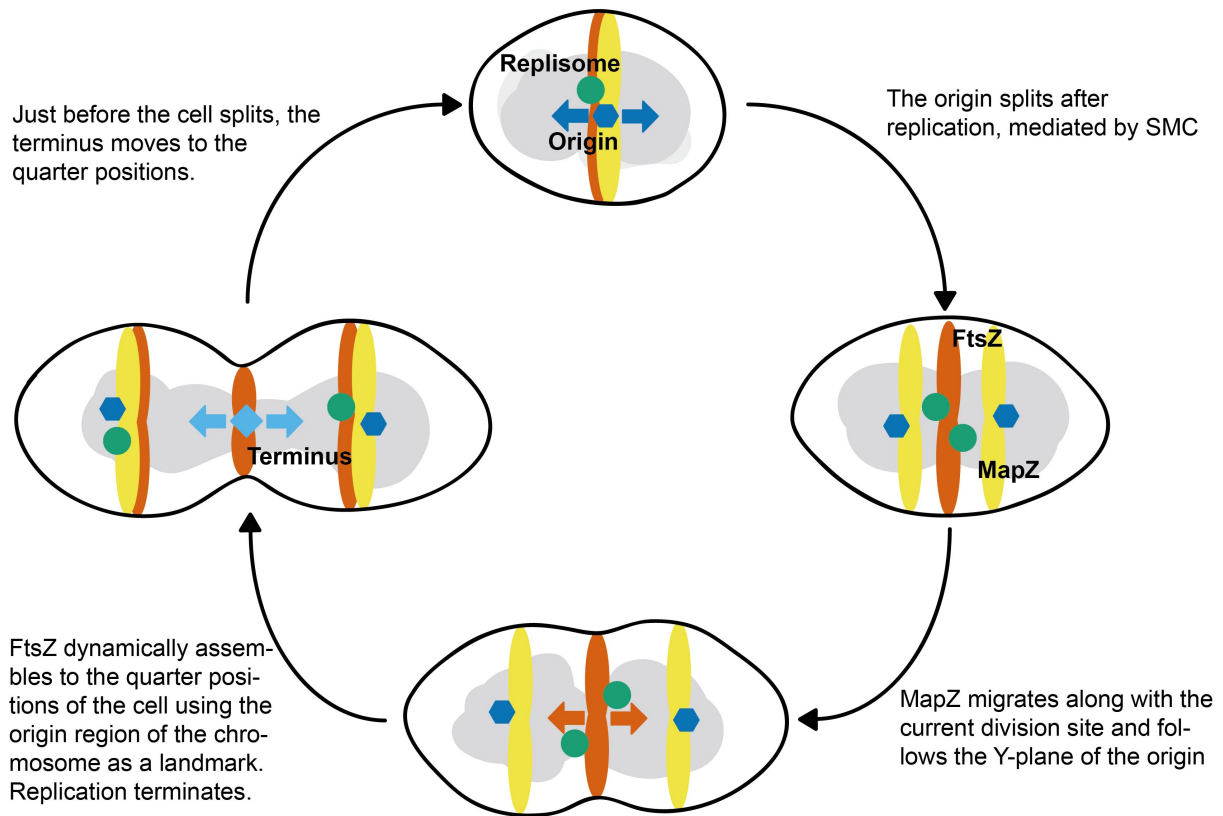

588

589 **Fig. 6. A schematic model for division site selection in pneumococci.**

590

591 **Supplementary materials**

592 Materials and Methods

593 Figures S1-S9

594 Tables S1-S2

595 Movies S1-S3

596 References
